# Supplementary material for: α Cell dysfunction in islets from nondiabetic, glutamic acid decarboxylase autoantibody–positive individuals
Source: PubMed Central journal article supplement (PMC9151702; doi:10.1172/jci156243), 2022-06-01
Supplement: jci-132-156243-s040.pdf [file jci-132-156243-s040.pdf]

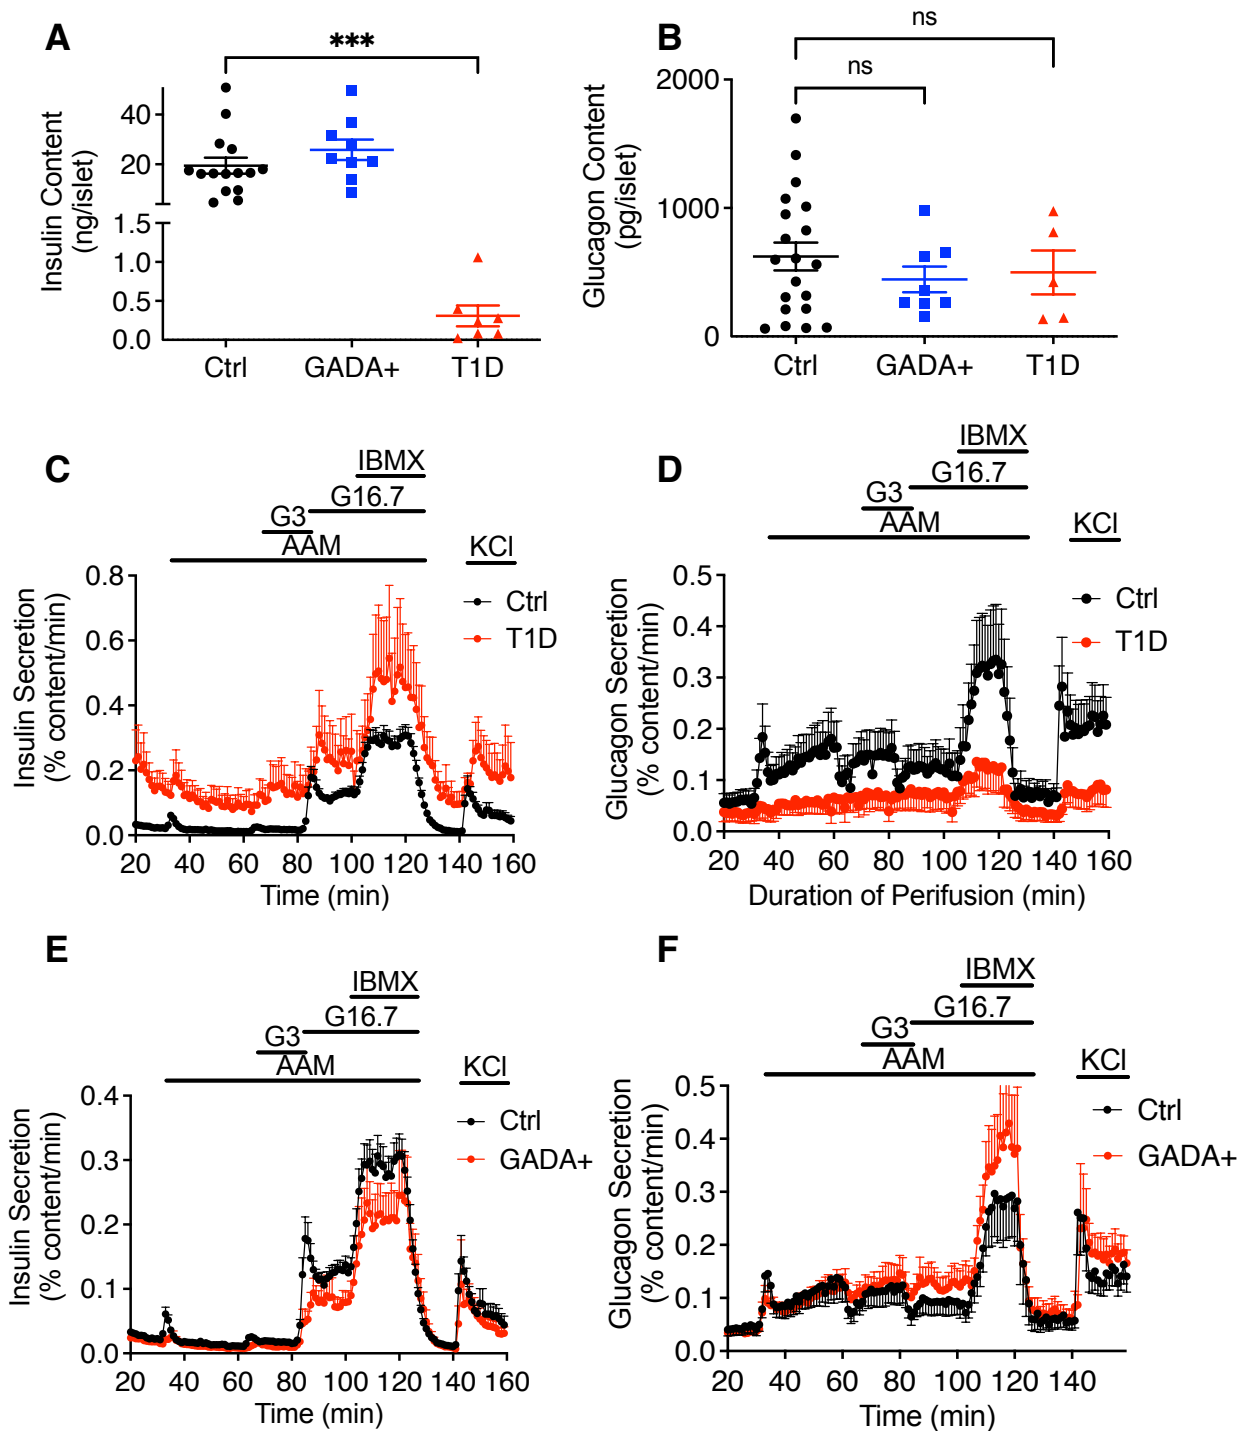

**Supplemental Figure S1.** (A) Insulin and (B) glucagon content of islets recovered after perfusion. (C) Insulin secretion profiles from perfusion of isolated islets of control and T1D donors, as percentage of total insulin content. (D) Glucagon secretion profiles from

perifusion of isolated islets of control and T1D donors, as percentage of total glucagon content. (E) Insulin secretion profiles from perifusion of isolated islets of control and GADA+ donors, as percentage of total insulin content. (F) Glucagon secretion profiles from perifusion of isolated islets of control and GADA+ donors, as percentage of total glucagon content.

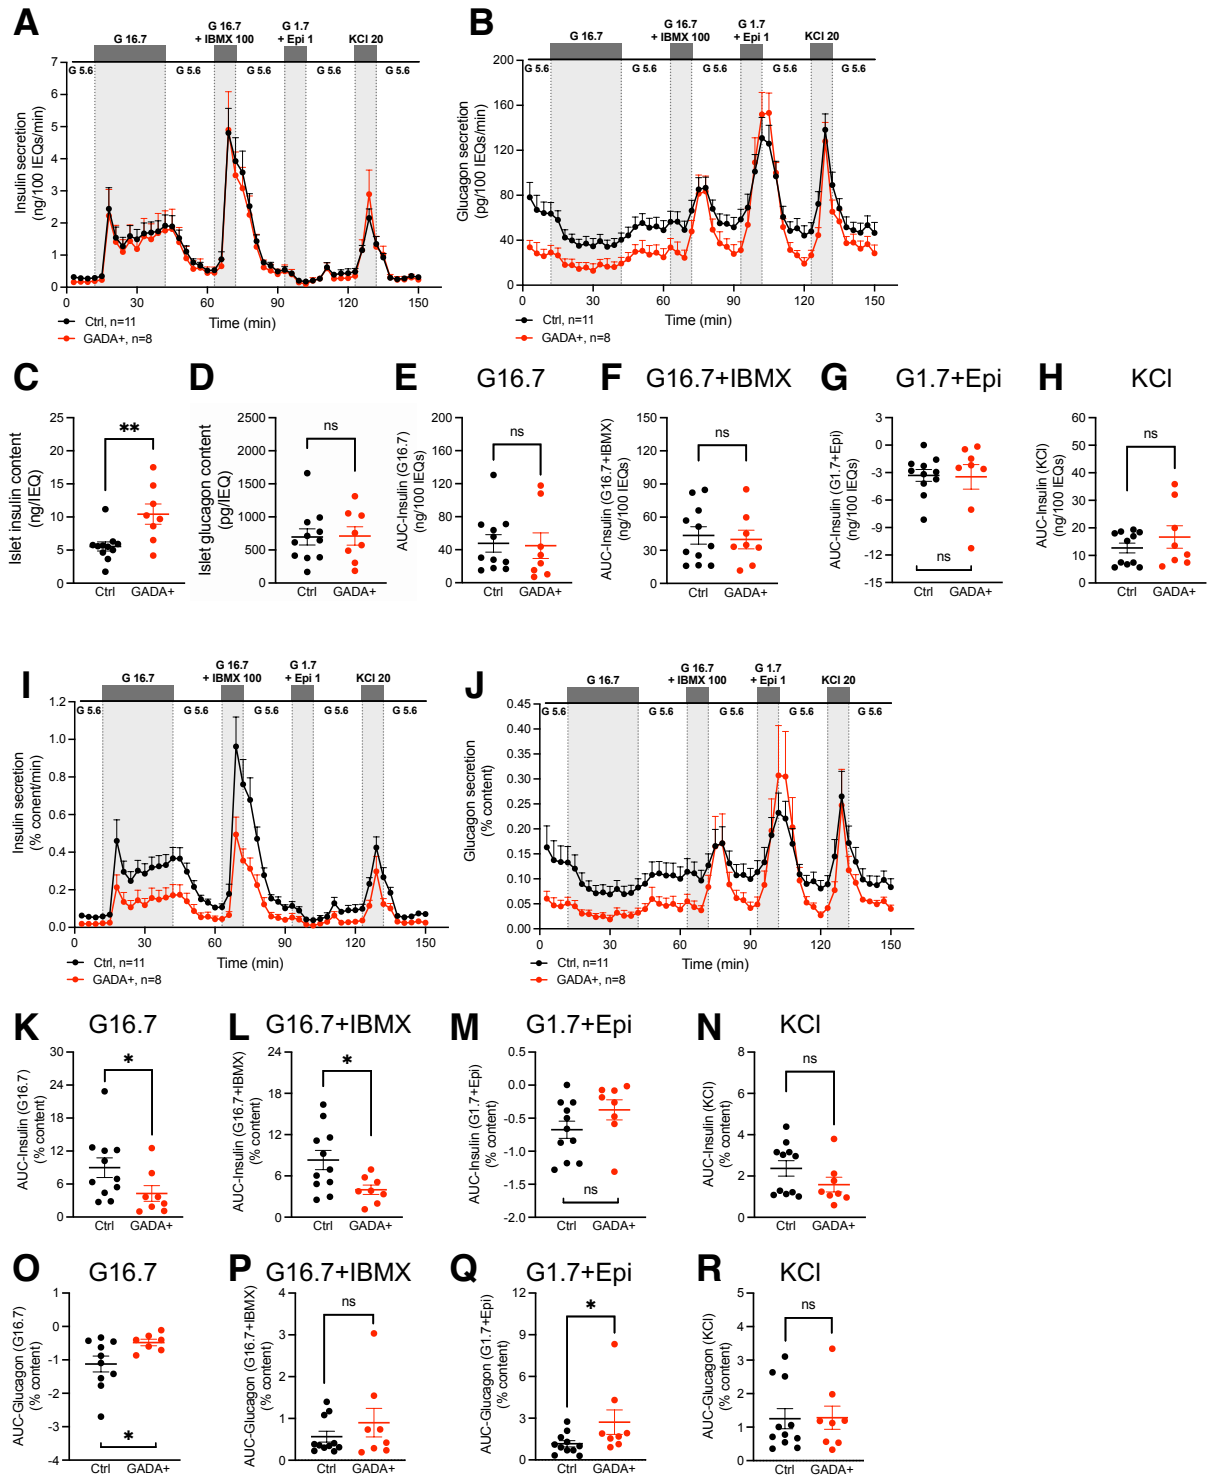

**Supplemental Figure S2. Secretory profiles of islets from GADA+ organ donors and controls assessed at Vanderbilt University.** Dynamic insulin (A) and glucagon (B) secretory response to various secretagogues measured by perfusion of control (Ctrl) and

GADA+ islets; G 5.6 – 5.6 mM glucose; G 16.7 – 16.7 mM glucose; G 16.7 + IBMX 100 – 16.7 mM glucose with 100  $\mu$ M isobutylmethylxanthine (IBMX); G1.7 + Epi 1 – 1.7 mM glucose and 1  $\mu$ M epinephrine; KCl 20 – 20 mM potassium chloride (KCl) was normalized to islet volume expressed by islet equivalents (IEQs); 1 IEQ corresponds to an islet with a diameter of 150  $\mu$ m. (C) Islet insulin content. (D) Islet glucagon content. (E-H) Integrated area under the curve (AUC) analyses to insulin secretagogues highlighted in gray in panel A. \*  $p < 0.05$ ; \*\*  $p < 0.01$ . Error bars indicate SEM. Panels C-H were analyzed by two-tailed t-test. (I) Insulin secretion profiles as percentage of total insulin content. (J) Glucagon secretion profiles as percentage of total glucagon content. (K-N) AUC analyses of insulin secretion highlighted in gray in panel I. (O-R) AUC analyses of glucagon secretion highlighted in gray in panel J.

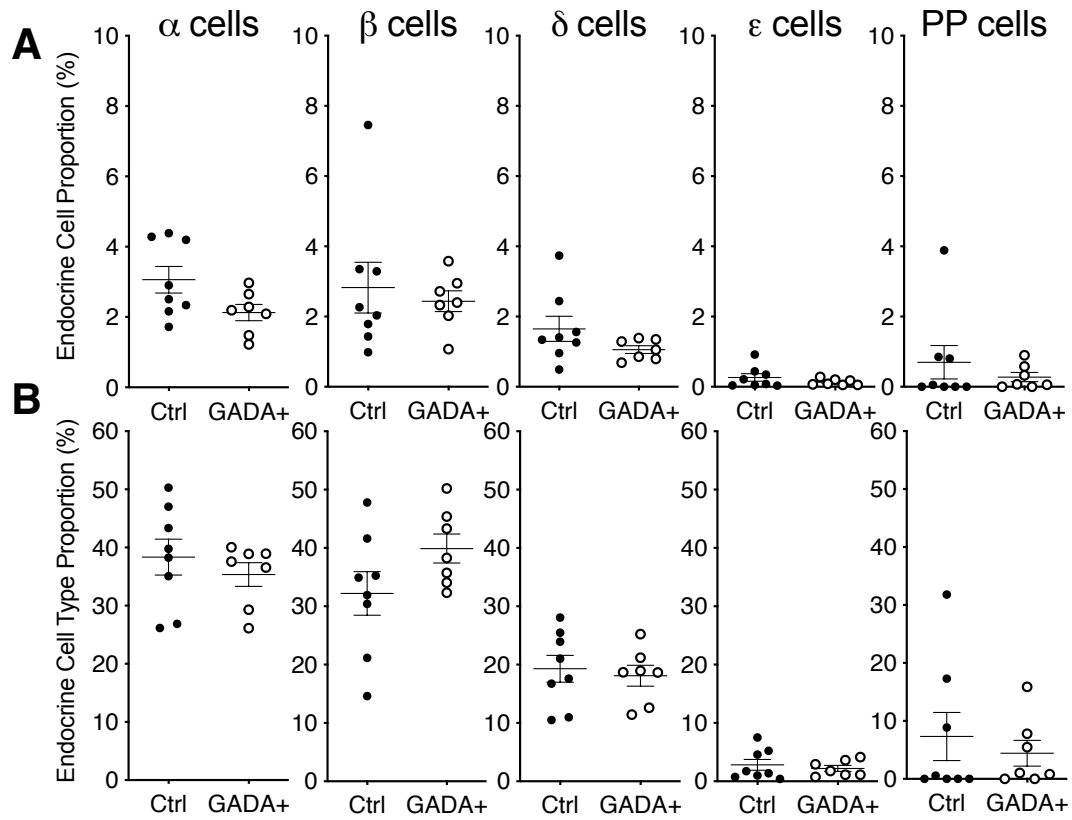

**Supplemental Figure S3. Quantification of cell type proportions for all donors, determined by IMC.** Panels represent proportions of each endocrine cell type as a proportion of (A) total cell number and (B) the endocrine cells.

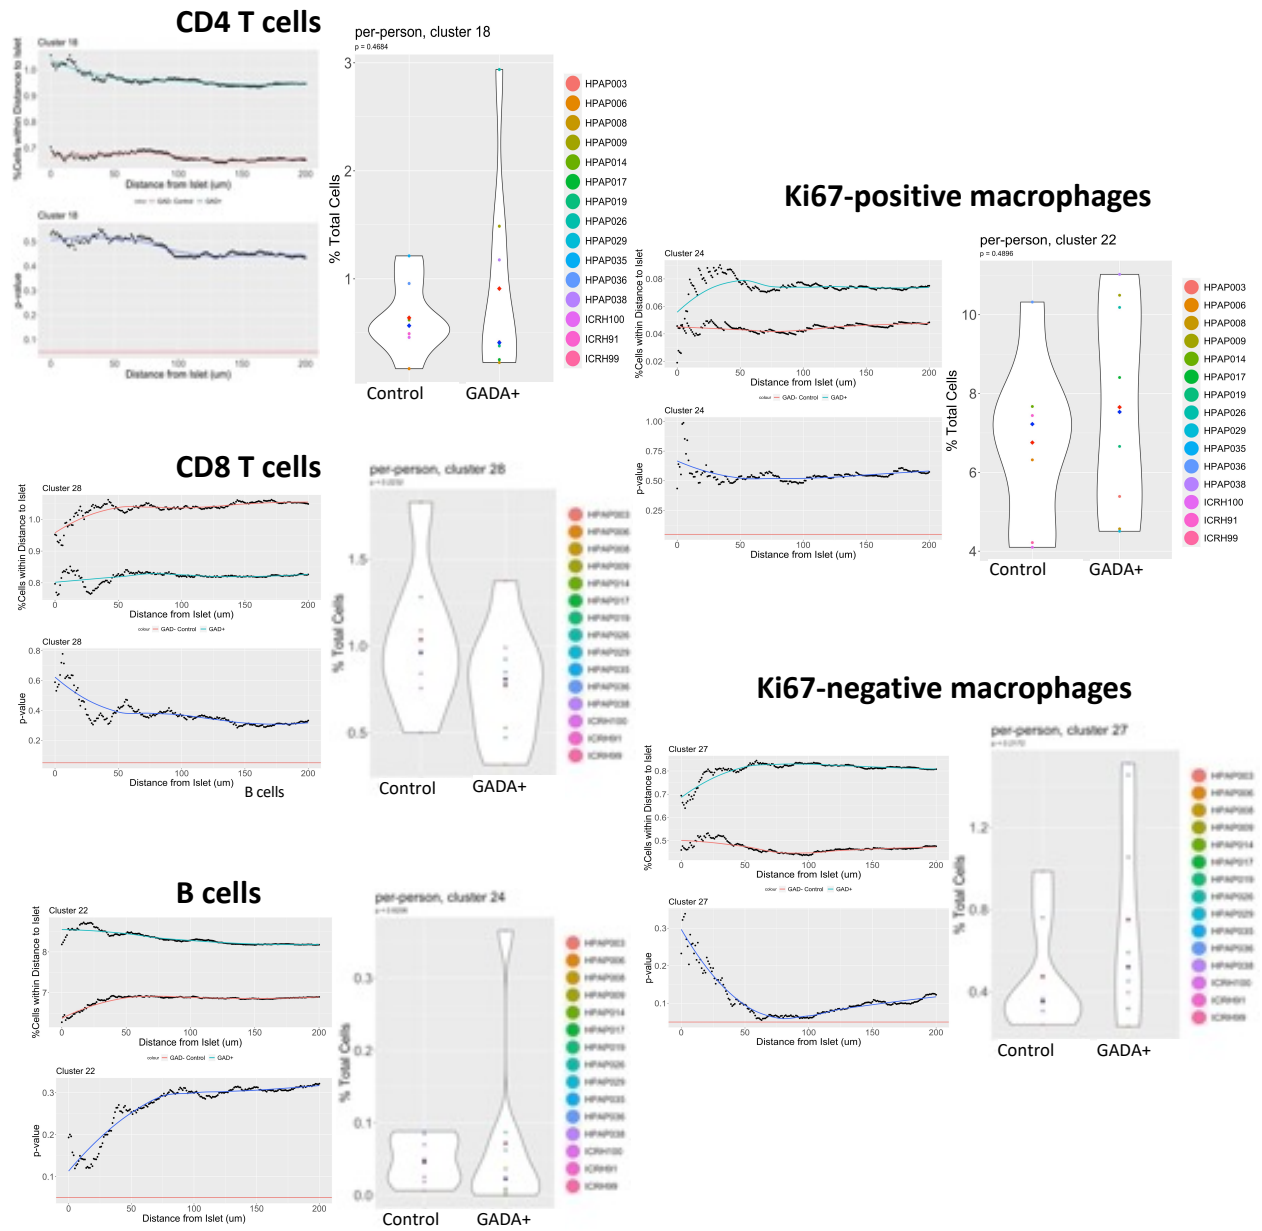

**Supplemental Figure S4. Immune cell infiltration as determined by imaging mass cytometry (IMC).** For various immune cell types, cell distributions by distance-from-islet were determined. Violin plots of mean distance by cell type and donor are also presented. P-values for comparison between GADA+ donors and controls are shown in the lower-left of each panel.

## Supplemental Table S1. Donor Information.

| ID                    | Recovery Center | Sex | Age (Years) | Race                      | BMI  | Medical History | T1D Duration | AutoAb (GADA+, IA-2+, mIAA+, and/or ZnT8+) <sup>a</sup> | HbA1c | C-peptide (ng/mL) | Perfusion (Penn) | Perfusion (Vanderbilt) | Flow CyTOF | IMC | scRNAseq | pCREB Analysis |
|-----------------------|-----------------|-----|-------------|---------------------------|------|-----------------|--------------|---------------------------------------------------------|-------|-------------------|------------------|------------------------|------------|-----|----------|----------------|
| <b>Control Donors</b> |                 |     |             |                           |      |                 |              |                                                         |       |                   |                  |                        |            |     |          |                |
| HPAP-012              | nPod            | F   | 18          | White                     | 29.6 | —               | —            | —                                                       | 4.5   | 4.1               | x                | x                      | x          | x   |          | x              |
| HPAP-018              | Penn            | M   | 31          | Hispanic or Latino        | 24.5 | —               | —            | —                                                       | 5.4   | 6.40              | x                | x                      | x          | x   |          | x              |
| HPAP-022              | Penn            | F   | 39          | White                     | 34.7 | —               | —            | —                                                       | 4.7   | 9.35              |                  |                        | x          |     | x        |                |
| HPAP-026              | nPod            | M   | 24          | White                     | 20.6 | —               | —            | —                                                       | 4.9   | 0.25              | x                | x                      | x          |     | x        | x              |
| HPAP-027              | Penn            | F   | 31          | White                     | 32.7 | —               | —            | —                                                       | 4.4   | 7.06              | x                |                        | x          | x   |          | x              |
| HPAP-034              | Penn            | M   | 13          | White                     | 18.7 | —               | —            | —                                                       | 5.2   | 12.7              |                  |                        | x          |     | x        |                |
| HPAP-035              | Penn            | M   | 35          | White                     | 26.9 | —               | —            | —                                                       | 5.2   | 15.90             | x                | x                      | x          | x   | x        | x              |
| HPAP-036              | nPod            | F   | 23          | White                     | 16.0 | —               | —            | —                                                       | 5.2   | 1.12              | x                |                        | x          | x   | x        | x              |
| HPAP-037              | Penn            | F   | 35          | White                     | 21.9 | —               | —            | —                                                       | 5.3   | 4.75              | x                |                        | x          |     | x        | x              |
| HPAP-039              | nPod            | F   | 5           | White                     | 16.3 | —               | —            | —                                                       | 6.8   | 1.88              |                  |                        | x          |     | x        |                |
| HPAP-040              | Penn            | M   | 35          | White                     | 24.0 | —               | —            | —                                                       | 5.4   | 7.01              | x                | x                      | x          |     | x        |                |
| HPAP-046              | Penn            | M   | 19          | Black or African American | 21.0 | —               | —            | —                                                       | 5.7   | 20.74             | x                | x                      |            |     |          |                |
| HPAP-047              | Penn            | M   | 8           | White                     | 16.8 | —               | —            | —                                                       | ND    | 1.24              |                  |                        | x          |     | x        |                |
| HPAP-052              | Penn            | M   | 27          | Black or African American | 38.7 | —               | —            | —                                                       | 5.2   | 4.07              | x                | x                      | x          |     |          |                |
| HPAP-054              | Penn            | F   | 40          | White                     | 30.0 | —               | —            | —                                                       | 4.8   | 6.38              | x                | x                      | x          |     |          |                |
| HPAP-056              | Penn            | M   | 33          | White                     | 32.9 | —               | —            | —                                                       | 5.6   | 14.41             | x                | x                      | x          |     |          |                |
| HPAP-059              | Penn            | M   | 35          | White                     | 38.0 | —               | —            | —                                                       | 5.1   | 8.18              | x                | x                      | x          |     |          |                |
| HPAP-074              | Penn            | F   | 40          | White                     | 36.9 | —               | —            | —                                                       | 6.3   | 4.25              | x                |                        | x          |     |          |                |
| HPAP-075              | Penn            | M   | 35          | White                     | 27.5 | —               | —            | —                                                       | 6.0   | 11.97             | x                |                        | x          |     |          |                |
| HPAP-080              | nPod            | M   | 22          | Black or African American | 35.7 | —               | —            | —                                                       | 5.4   | 15.35             | x                | x                      | x          |     |          |                |
| ICRH91 <sup>b</sup>   | Penn            | F   | 35          | White                     | 23.6 | —               | —            | —                                                       | 4.6   | N/A               | x                |                        |            | x   |          |                |
| ICRH99 <sup>c</sup>   | Penn            | M   | 17          | White                     | 25.6 | —               | —            | —                                                       | 5.0   | N/A               | x                |                        |            | x   |          |                |
| ICRH100 <sup>d</sup>  | Penn            | M   | 30          | White                     | 22.4 | —               | —            | —                                                       | 5.3   | N/A               | x                |                        |            | x   |          |                |
| <b>GADA+ Donors</b>   |                 |     |             |                           |      |                 |              |                                                         |       |                   |                  |                        |            |     |          |                |
| HPAP-003              | nPod            | M   | 29          | White                     | 24.5 | —               | —            | GADA+                                                   | 5.6   | 9.00              | x                | x                      | x          | x   |          | x              |
| HPAP-008              | nPod            | F   | 24          | White                     | 31.9 | —               | —            | GADA+                                                   | 5.2   | 27.05             | x                | x                      | x          | x   |          | x              |
| HPAP-017              | nPod            | M   | 30          | White                     | 23.7 | —               | —            | GADA+                                                   | 5.5   | 3.71              | x                | x                      | x          | x   |          | x              |
| HPAP-019              | nPod            | M   | 22          | White                     | 29.8 | —               | —            | GADA+                                                   | 5.2   | 8.82              | x                | x                      | x          | x   |          | x              |
| HPAP-024              | nPod            | M   | 18          | White                     | 24.3 | —               | —            | GADA+                                                   | 5.5   | 5.6               |                  |                        | x          |     | x        |                |
| HPAP-029              | nPod            | M   | 23          | White                     | 28.6 | —               | —            | GADA+                                                   | 5.3   | 3.83              | x                | x                      | x          | x   | x        | x              |
| HPAP-038              | nPod            | M   | 13          | White                     | 18.3 | —               | —            | GADA+                                                   | 5.7   | 8.29              | x                | x                      | x          | x   | x        | x              |
| HPAP-045              | nPod            | F   | 27          | White                     | 26.2 | —               | —            | GADA+                                                   | 5.2   | 1.70              | x                | x                      | x          |     | x        |                |
| HPAP-049              | nPod            | M   | 29          | White                     | 32.7 | —               | —            | GADA+                                                   | 5.4   | 6.15              | x                | x                      | x          |     | x        |                |
| HPAP-050              | nPod            | F   | 22          | Hispanic or Latino        | 29.0 | —               | —            | GADA+                                                   | 5.1   | 3.79              | x                |                        | x          |     | x        |                |
| <b>T1D Donors</b>     |                 |     |             |                           |      |                 |              |                                                         |       |                   |                  |                        |            |     |          |                |
| HPAP-002              | nPod            | M   | 26          | Hispanic or Latino        | 16.4 | T1D             | 5 years      | —                                                       | 9.8   | 0.51              | x                |                        | x          |     |          |                |
| HPAP-015              | nPod            | M   | 29          | White                     | 22.0 | T1D             | 7 years      | mIAA+                                                   | ND    | 0.03              | x                |                        | x          |     |          |                |
| HPAP-020              | nPod            | M   | 14          | White                     | 13.3 | T1D             | 0            | GADA+, IA-2+, mIAA+, ZnT8+                              | ND    | 0.37              | x                |                        | x          |     |          |                |
| HPAP-021              | nPod            | F   | 13          | White                     | 21.4 | T1D             | 7 years      | mIAA+                                                   | ND    | <0.02             | x                |                        | x          |     |          |                |
| HPAP-055              | Penn            | M   | 24          | Hispanic or Latino        | 27.9 | T1D             | 7 years      | GADA+, IA-2+, mIAA+, ZnT8+                              | 10.8  | <0.02             | x                |                        | x          |     |          |                |
| HPAP-071              | nPod            | F   | 12          | White                     | 15.4 | T1D             | 3 years      | IA-2+                                                   | 9.8   | 0.06              | x                |                        |            |     |          |                |

<sup>a</sup>All donors were tested for the presence of all four autoantibodies in the panel.

<sup>b</sup>ICRH91 (UNOS ADBD275)

<sup>c</sup>ICRH99 (UNOS ADGB379)

<sup>d</sup>ICRH100 (UNOS ADID386)

## Supplemental Table 2. Differentially expressed genes between GADA+ and control alpha cells.

| Gene Symbol | Description                                           | log <sub>2</sub> FC | padj  |
|-------------|-------------------------------------------------------|---------------------|-------|
| MRLN        | myoregulin                                            | -2.575              | 0.002 |
| PSMB10      | proteasome 20S subunit beta 10                        | -2.591              | 0.002 |
| SAMD11      | sterile alpha motif domain containing 11              | -0.159              | 0.004 |
| G6PC2       | glucose-6-phosphatase catalytic subunit 2             | -2.775              | 0.005 |
| SCD5        | stearoyl-CoA desaturase 5                             | -0.205              | 0.005 |
| GPM6A       | glycoprotein M6A                                      | -0.081              | 0.005 |
| TCIM        | transcriptional and immune response regulator         | -0.084              | 0.005 |
| NPM3        | nucleophosmin/nucleoplasmin 3                         | -1.702              | 0.005 |
| PDX1        | pancreatic and duodenal homeobox 1                    | -0.118              | 0.005 |
| MRPL52      | mitochondrial ribosomal protein L52                   | -1.497              | 0.005 |
| SIX3-AS1    | SIX3 antisense RNA 1                                  | -0.078              | 0.008 |
| PKIB        | cAMP-dependent protein kinase inhibitor beta          | -2.296              | 0.008 |
| GADD45GIP1  | GADD45G interacting protein 1                         | -0.752              | 0.010 |
| NEIL2       | nei like DNA glycosylase 2                            | -1.001              | 0.010 |
| FFAR4       | free fatty acid receptor 4                            | -0.094              | 0.010 |
| C2orf76     | chromosome 2 open reading frame 76                    | -2.329              | 0.011 |
| DLK1        | delta like non-canonical Notch ligand 1               | -0.069              | 0.011 |
| TMEM99      | KRT10 antisense RNA 1                                 | -0.222              | 0.011 |
| SDHAF3      | succinate dehydrogenase complex assembly factor 3     | -1.848              | 0.011 |
| PCDH7       | protocadherin 7                                       | -0.079              | 0.015 |
| SEMA6A      | semaphorin 6A                                         | -0.153              | 0.020 |
| SNCA        | synuclein alpha                                       | -1.379              | 0.021 |
| MAFA        | MAF bZIP transcription factor A                       | -0.149              | 0.021 |
| TGFBR3      | transforming growth factor beta receptor 3            | -0.094              | 0.024 |
| HIBADH      | 3-hydroxyisobutyrate dehydrogenase                    | -1.754              | 0.024 |
| C11orf74    | intraflagellar transport associated protein           | -1.929              | 0.024 |
| MRPL24      | mitochondrial ribosomal protein L24                   | -1.516              | 0.024 |
| SP110       | SP110 nuclear body protein                            | -0.094              | 0.024 |
| RTL8C       | retrotransposon Gag like 8C                           | -1.547              | 0.024 |
| PPP1R11     | protein phosphatase 1 regulatory inhibitor subunit 11 | -1.506              | 0.024 |
| STX8        | syntaxin 8                                            | -1.069              | 0.024 |
| ISOC1       | isochorismatase domain containing 1                   | -1.570              | 0.027 |
| TUBB2B      | tubulin beta 2B class IIb                             | -0.165              | 0.027 |
| MOSPD3      | motile sperm domain containing 3                      | -0.909              | 0.028 |
| CALD1       | caldesmon 1                                           | -0.118              | 0.028 |
| TMEM126A    | transmembrane protein 126A                            | -0.985              | 0.028 |
| HSPBP1      | HSPA (Hsp70) binding protein 1                        | -1.345              | 0.030 |
| FAM229B     | family with sequence similarity 229 member B          | -1.054              | 0.030 |
| TMEM126B    | transmembrane protein 126B                            | -1.692              | 0.030 |
| ZNF609      | zinc finger protein 609                               | 1.287               | 0.037 |
| S100A11     | S100 calcium binding protein A11                      | -1.412              | 0.040 |
| AMN1        | antagonist of mitotic exit network 1 homolog          | -1.111              | 0.040 |
| LINC02182   | long intergenic non-protein coding RNA 2182           | -0.177              | 0.040 |
| PYCR2       | pyrroline-5-carboxylate reductase 2                   | -1.587              | 0.040 |
| RAB3C       | RAB3C, member RAS oncogene family                     | -1.338              | 0.040 |
| HMGN4       | high mobility group nucleosomal binding domain 4      | -1.846              | 0.043 |
| CCND1       | cyclin D1                                             | -0.135              | 0.043 |
| BORCS8      | BLOC-1 related complex subunit 8                      | -1.480              | 0.043 |
| CMSS1       | cms1 ribosomal small subunit homolog                  | -1.601              | 0.044 |
| TSHZ2       | teashirt zinc finger homeobox 2                       | -0.091              | 0.044 |
| SIX3        | SIX homeobox 3                                        | -0.099              | 0.044 |
| MGST3       | microsomal glutathione S-transferase 3                | -0.687              | 0.045 |

Gene expression data obtained by scRNAseq was compared between alpha cells from GADA+ and control donors. Genes with adjusted p-value (padj)<0.05 from the DESeq2 analyses are listed here. Fold change (FC) compares GADA+ donors to controls.



# HPAP Consortium

## University of Pennsylvania

- Nicolai Doliba
- Erin Duffy
- Babak Faryabi
- Klaus H. Kaestner
- Chengyang Liu
- Elisabetta Manduchi
- Ali Naji
- Andrea Rozo
- Jonathan Schug
- Suzanne Shapira
- Doris Stoffers
- Golnaz Vahedi
- Benjamin Voight

## Vanderbilt University

- Marcela Brissova
- Chunhua Dai
- Alvin C. Powers
- Diane Saunders

## University of Florida

- Mark Atkinson
- Irina Kusmartseva
- Amanda Posgai
- Clive Wasserfall
- Mingder Yang

## Stanford University

- Anna Gloyn
- Seung Kim

## University of Alberta

- Patrick MacDonald

## Mt. Sinai School of Medicine

- Dirk Homann
